# Supplementary material for: Facile fabrication of hierarchical porous rose-like NiCo2O4 nanoflake/MnCo2O4 nanoparticle composites with enhanced electrochemical performance for energy storage
Source: Royal Society of Chemistry journal article supplement (doi:10.1039/c5ta03017j), 2015-01-01
Supplement: c5ta03017j1.pdf [file c5ta03017j1.pdf]

## Supporting Information

### Facile fabrication of hierarchical porous rose-like NiCo<sub>2</sub>O<sub>4</sub>/MnCo<sub>2</sub>O<sub>4</sub> with enhanced electrochemical performance for energy storage

YanJun Zhai<sup>a</sup>, Hongzhi Mao<sup>a</sup>, Peng Liu<sup>a</sup>, Xiaochuan Ren<sup>c</sup>, Liqiang Xu<sup>\*a</sup> and Yitai Qian<sup>ab</sup>

<sup>a</sup>Key Laboratory of Colloid and Interface Chemistry, Shandong University, Ministry of Education, School of Chemistry and Chemical Engineering, Jinan 250100, China.

<sup>b</sup>Hefei National Laboratory for Physical Science at Microscale, Department of Chemistry, University of Science and Technology of China, Hefei 230026, China.

<sup>c</sup>Research Institute of Surface Engineering, Taiyuan University of Technology, Taiyuan, 030024, China

\*Corresponding Author. Email: [xulq@sdu.edu.cn](mailto:xulq@sdu.edu.cn), Tel. & Fax: +86 531 88364543.

### Figure captions:

**Fig. S1** (a, b) SEM, (c) TEM, (d) EDX mapping images of the Ni-Co-based precursors and (e) TEM of the Ni-Co-Mn-based precursors.

**Fig. S2** Thermogravimetric analysis (TGA) of the as-prepared Ni-Co-Mn-based precursors.

**Fig. S3** XRD patterns of as-prepared pure NiCo<sub>2</sub>O<sub>4</sub>.

**Tab. S1** Some diffraction peaks of the prepared NiCo<sub>2</sub>O<sub>4</sub>/MnCo<sub>2</sub>O<sub>4</sub>, NiCo<sub>2</sub>O<sub>4</sub>, NiCo<sub>2</sub>O<sub>4</sub> (JCPDS card no. 73-1702) and MnCo<sub>2</sub>O<sub>4</sub> (JCPDS card no. 23-1237).

**Fig. S4** Raman spectra of NiCo<sub>2</sub>O<sub>4</sub>/MnCo<sub>2</sub>O<sub>4</sub> and NiCo<sub>2</sub>O<sub>4</sub> excited with 473 nm laser.

**Tab. S2** The Raman peak positions of the synthesized products and previously reported NiCo<sub>2</sub>O<sub>4</sub>, MnCo<sub>2</sub>O<sub>4</sub> and manganese-based oxides.

**Fig. S5** EDS spectrum of NiCo<sub>2</sub>O<sub>4</sub>/MnCo<sub>2</sub>O<sub>4</sub>.

**Tab. S3** The interplanar spacing of the prepared NiCo<sub>2</sub>O<sub>4</sub>/MnCo<sub>2</sub>O<sub>4</sub>, NiCo<sub>2</sub>O<sub>4</sub> (JCPDS card no. 73-1702) and MnCo<sub>2</sub>O<sub>4</sub> (JCPDS card no. 23-1237).

**Fig. S6** (a, b, c) TEM images, (d) HRTEM image and (e, f) SEM images of the as-prepared mesoporous NiCo<sub>2</sub>O<sub>4</sub> hierarchical architectures.

**Fig. S7** TEM images of the Ni-Co-based precursors synthesized at 180 °C for (a, b) 40 min (c, d) 50 min, (e, f) 2.0 h, (g, h) 5.0 h, (i, j) 12.0 h and (k, l)15.0 h.

**Fig. S8** TEM images of the Ni-Co-based precursors synthesized with different amounts of TEA: (a) 0 ml, (b) 3 ml, (c) 6 ml, (d) 10 ml at 180 °C while keeping other experimental parameters unchanged; (e) the possible formation mechanism of the 3D hierarchical porous rose-like architectures.

**Fig. S9** Nitrogen adsorption-desorption isotherm and the corresponding pore size distribution (inset) of (a) hierarchical porous rose-like NiCo<sub>2</sub>O<sub>4</sub> and (b) hierarchical porous rose-like NiCo<sub>2</sub>O<sub>4</sub>/MnCo<sub>2</sub>O<sub>4</sub>.

**Fig. S10** The first five cyclic voltammogram curves of the 3D hierarchical porous rose-like NiCo<sub>2</sub>O<sub>4</sub>.

**Fig. S11** (a) CV curves of NiCo<sub>2</sub>O<sub>4</sub>/MnCo<sub>2</sub>O<sub>4</sub> at different scan rate after 350 cycles and (b) log<sub>i</sub> vs. log<sub>v</sub> plots at different peaks.

**Fig. S12** Cycling performance of NiCo<sub>2</sub>O<sub>4</sub>/MnCo<sub>2</sub>O<sub>4</sub> with active materials of 70 % at 500 and 1000 mA g<sup>-1</sup>.

**Fig. S13** (a) Nyquist plots of the AC impedance spectra measured over the frequency ranging from 100 kHz to 0.01 Hz and (b, c) the direct current resistance (R<sub>dc</sub>) for the NiCo<sub>2</sub>O<sub>4</sub>/MnCo<sub>2</sub>O<sub>4</sub> and NiCo<sub>2</sub>O<sub>4</sub> electrodes. (d) The AC impedance spectra of the NiCo<sub>2</sub>O<sub>4</sub>/MnCo<sub>2</sub>O<sub>4</sub> after certain cycles at 1000 mA g<sup>-1</sup> in the frequency ranging from 100 kHz to 0.01 Hz.

**Fig. S14** (a) TEM image of the acetylene-black used as active material and (b) TEM image of NiCo<sub>2</sub>O<sub>4</sub>/MnCo<sub>2</sub>O<sub>4</sub> composite used as active material (marked by the red frame) and acetylene-black acted as conductive agent after ten cycles at a current density of 1000 mA g<sup>-1</sup>.

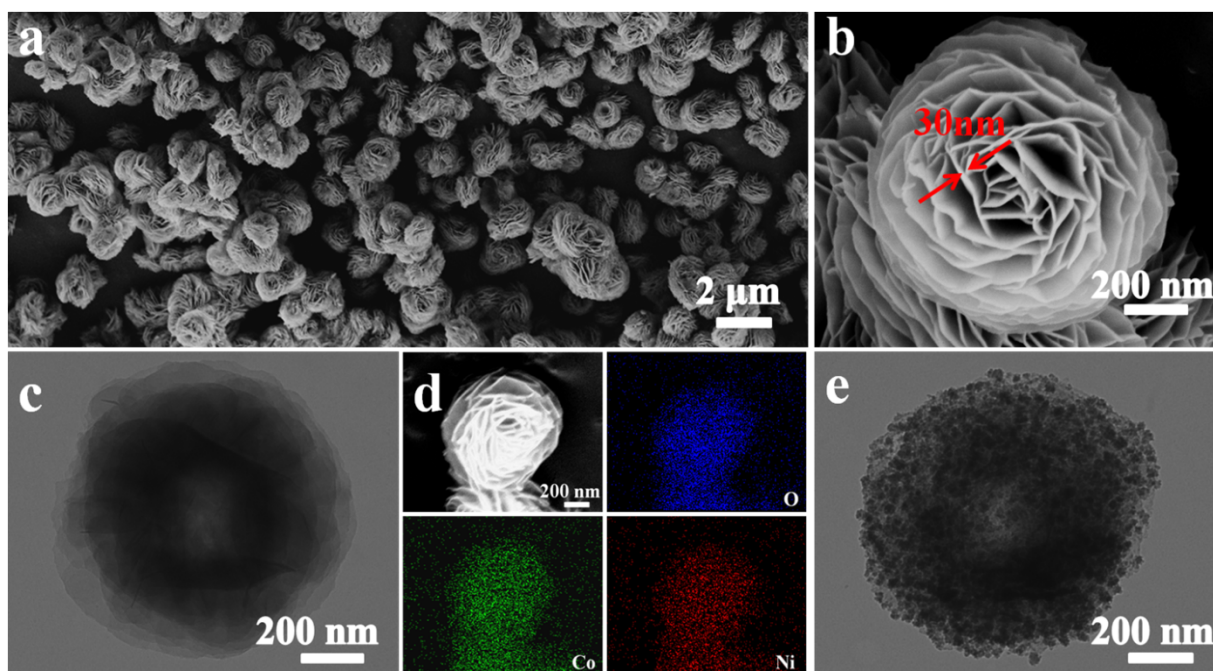

**Fig. S1** (a, b) SEM, (c) TEM, (d) EDX mapping images of the Ni-Co-based precursors and (e) TEM of the Ni-Co-Mn-based precursors.

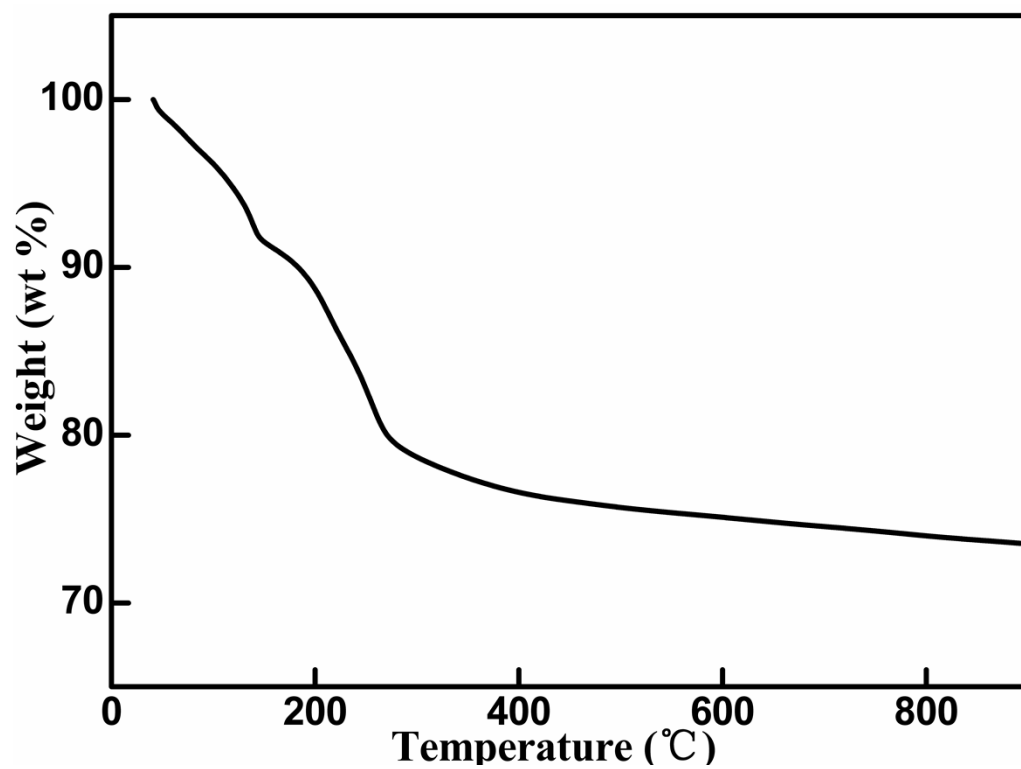

**Fig. S2** Thermogravimetric analysis (TGA) of the as-prepared Ni-Co-Mn-based precursors.

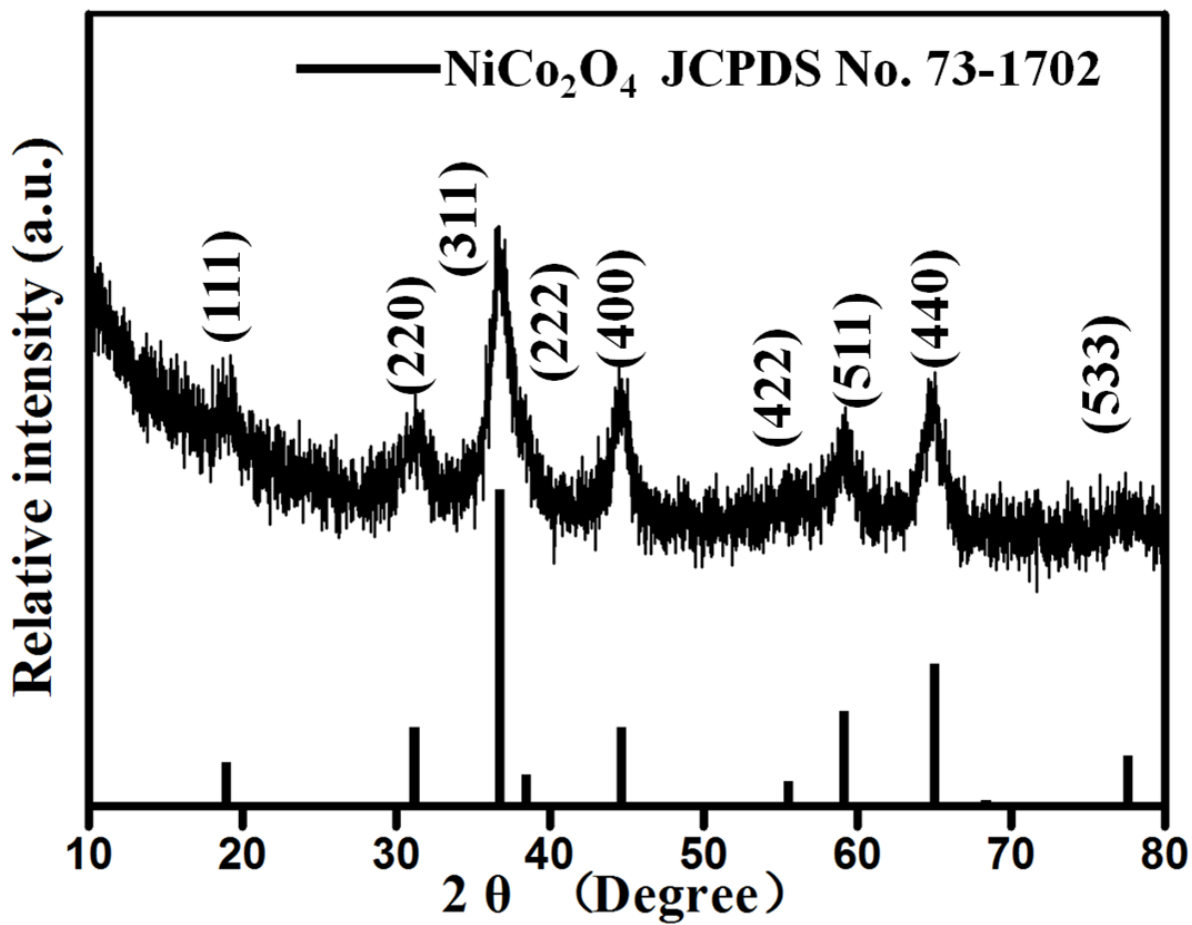

Fig. S3 XRD patterns of as-prepared pure  $\text{NiCo}_2\text{O}_4$ .

**Tab. S1** Some diffraction peak positions of the prepared NiCo<sub>2</sub>O<sub>4</sub>/MnCo<sub>2</sub>O<sub>4</sub>, NiCo<sub>2</sub>O<sub>4</sub>, NiCo<sub>2</sub>O<sub>4</sub> (JCPDS card no. 73–1702) and MnCo<sub>2</sub>O<sub>4</sub> (JCPDS card no. 23–1237).

| Samples                                                            | 2θ (degree) |        |        |        |        |        |        |
|--------------------------------------------------------------------|-------------|--------|--------|--------|--------|--------|--------|
|                                                                    | (111)       | (220)  | (311)  | (400)  | (422)  | (511)  | (440)  |
| NiCo <sub>2</sub> O <sub>4</sub> /MnCo <sub>2</sub> O <sub>4</sub> | 18.66       | 30.76  | 36.35  | 44.20  | 54.87  | 58.49  | 64.28  |
| NiCo <sub>2</sub> O <sub>4</sub>                                   | 19.03       | 31.37  | 36.71  | 44.59  | 54.40  | 59.18  | 64.94  |
| NiCo <sub>2</sub> O <sub>4</sub><br>(JCPDS no. 73-1702)            | 18.928      | 31.152 | 36.705 | 44.635 | 55.431 | 59.115 | 64.963 |
| MnCo <sub>2</sub> O <sub>4</sub><br>(JCPDS no. 23-1237)            | 18.547      | 30.537 | 35.995 | 43.759 | 54.336 | 57.909 | 63.622 |

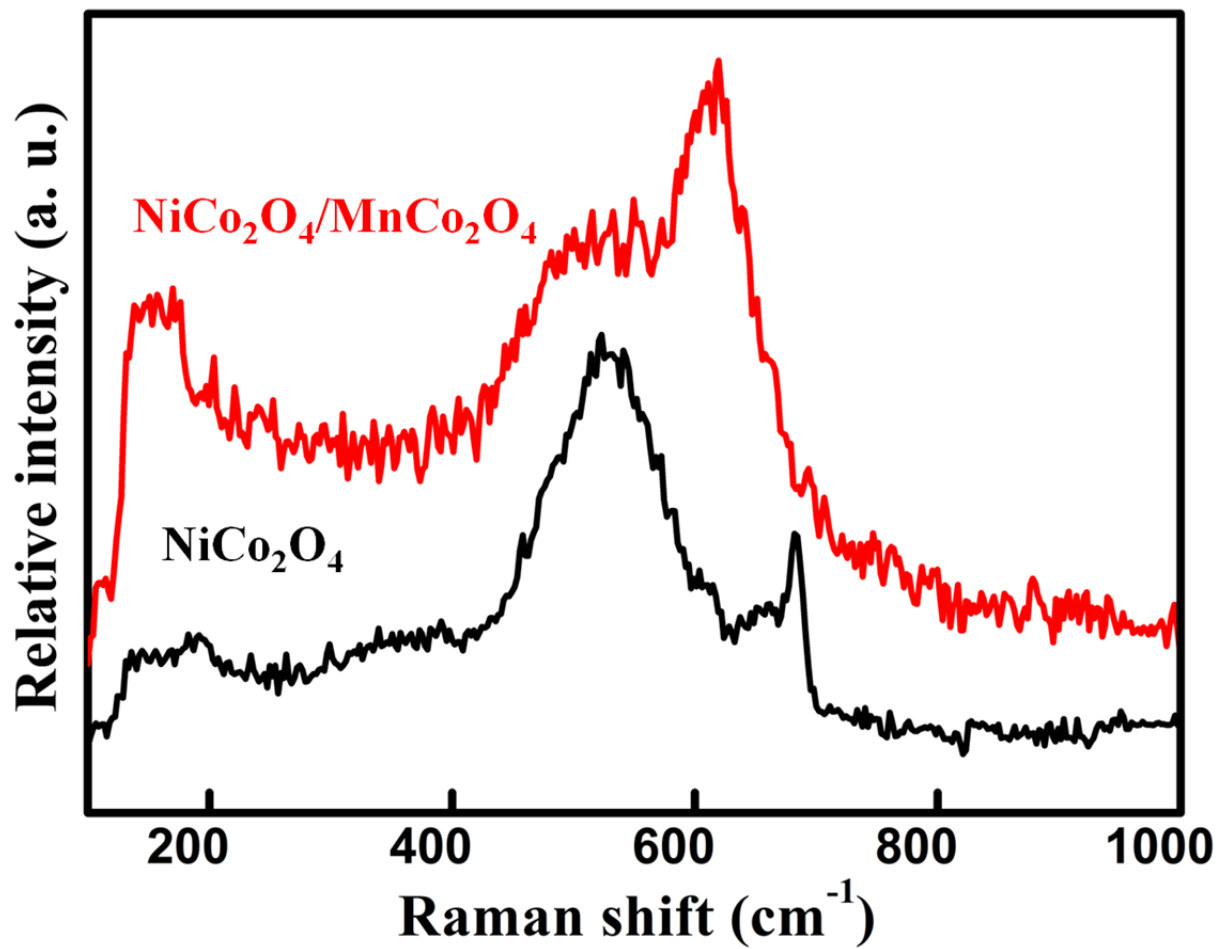

Fig. S4 Raman spectra of NiCo<sub>2</sub>O<sub>4</sub>/MnCo<sub>2</sub>O<sub>4</sub> and NiCo<sub>2</sub>O<sub>4</sub> excited with 473 nm laser.

**Tab. S2** The Raman peak positions of the synthesized products and previously reported NiCo<sub>2</sub>O<sub>4</sub>, MnCo<sub>2</sub>O<sub>4</sub> and manganese-based oxides.

| Sample                                                                 | Raman shift (cm <sup>-1</sup> ) |     |     |     |     |     |     |     |     |   | Ref.      |
|------------------------------------------------------------------------|---------------------------------|-----|-----|-----|-----|-----|-----|-----|-----|---|-----------|
| NiCo <sub>2</sub> O <sub>4</sub> /<br>MnCo <sub>2</sub> O <sub>4</sub> | 184                             | -   | -   | 481 | 516 | 549 | 622 | -   | -   | - | This work |
|                                                                        | 202                             |     |     |     | 532 |     |     |     |     |   |           |
| NiCo <sub>2</sub> O <sub>4</sub>                                       | 195                             | -   | -   | 458 | 523 | 543 | -   | 683 | -   | - | This work |
| NiCo <sub>2</sub> O <sub>4</sub>                                       | 219                             | -   | -   | 473 | -   | 552 | -   | 676 | -   | - | 17        |
| NiCo <sub>2</sub> O <sub>4</sub>                                       | 186                             | -   | -   | 456 | 504 | -   | 648 | -   | -   | - | 18        |
| MnCo <sub>2</sub> O <sub>4</sub>                                       | 200                             | -   | -   | 480 | 520 |     | 667 | 680 | -   | - | 19        |
| MnCo <sub>2</sub> O <sub>4</sub>                                       | 188                             | -   | -   | 492 | -   | 567 | 668 | -   | -   | - | 20        |
| α-Mn <sub>2</sub> O <sub>3</sub>                                       | -                               | -   | 396 | -   | -   | -   | -   | 690 | -   | - |           |
| Mn <sub>3</sub> O <sub>4</sub>                                         | -                               | 291 | 375 | 480 | -   | -   | -   | 657 | -   | - | 21        |
| β-MnO <sub>2</sub>                                                     | 162                             | -   | -   | -   | -   | 538 | -   | 667 | 750 |   |           |



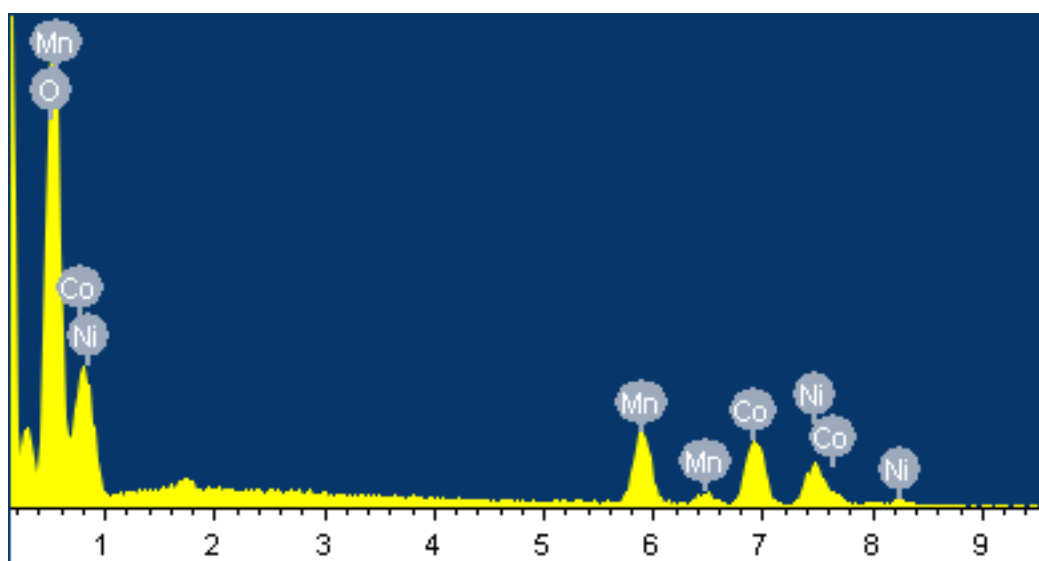

**Fig. S5** EDS spectrum of NiCo<sub>2</sub>O<sub>4</sub>/MnCo<sub>2</sub>O<sub>4</sub>.

**Tab. S3** the interplanar spacing of the prepared NiCo<sub>2</sub>O<sub>4</sub>/MnCo<sub>2</sub>O<sub>4</sub>, NiCo<sub>2</sub>O<sub>4</sub> (JCPDS card no. 73-1702) and MnCo<sub>2</sub>O<sub>4</sub> (JCPDS card no. 23-1237).

| Samples                                                            | D (Å) |       |       |       |       |
|--------------------------------------------------------------------|-------|-------|-------|-------|-------|
|                                                                    | (440) | (511) | (400) | (311) | (220) |
| NiCo <sub>2</sub> O <sub>4</sub> /MnCo <sub>2</sub> O <sub>4</sub> | 1.47  | 1.61  | 2.08  | 2.51  | 2.94  |
| NiCo <sub>2</sub> O <sub>4</sub><br>(JCPDS no. 73-1702)            | 1.43  | 1.56  | 2.03  | 2.45  | 2.87  |
| MnCo <sub>2</sub> O <sub>4</sub><br>(JCPDS no. 23-1237)            | 1.46  | 1.59  | 2.07  | 2.49  | 2.92  |

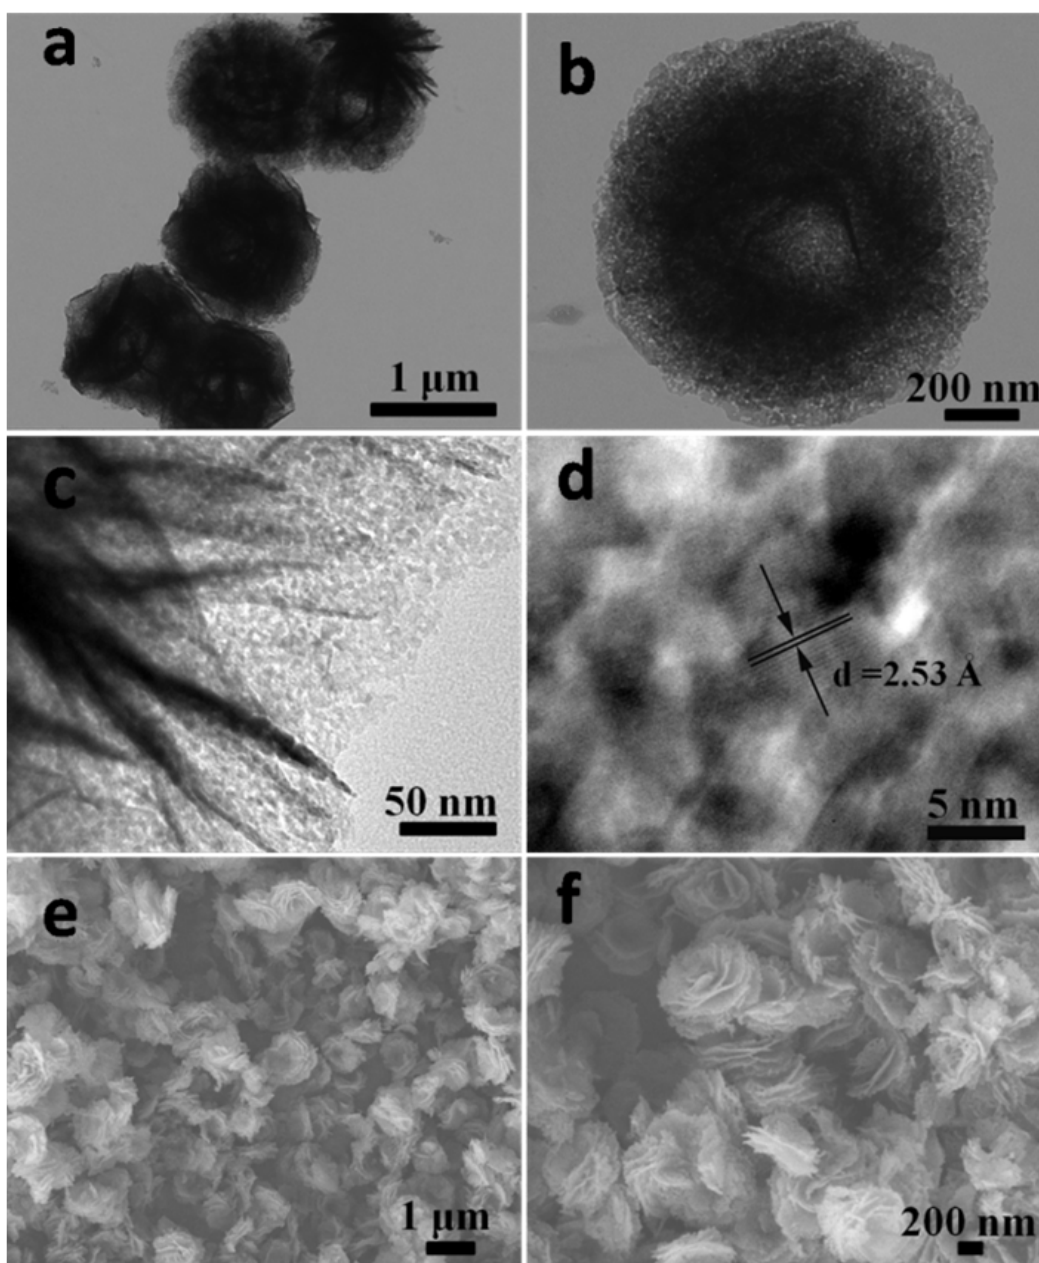

**Fig. S6** (a, b, c) TEM images, (d) HRTEM image and (e, f) SEM images of the as-prepared mesoporous  $\text{NiCo}_2\text{O}_4$  hierarchical architectures.

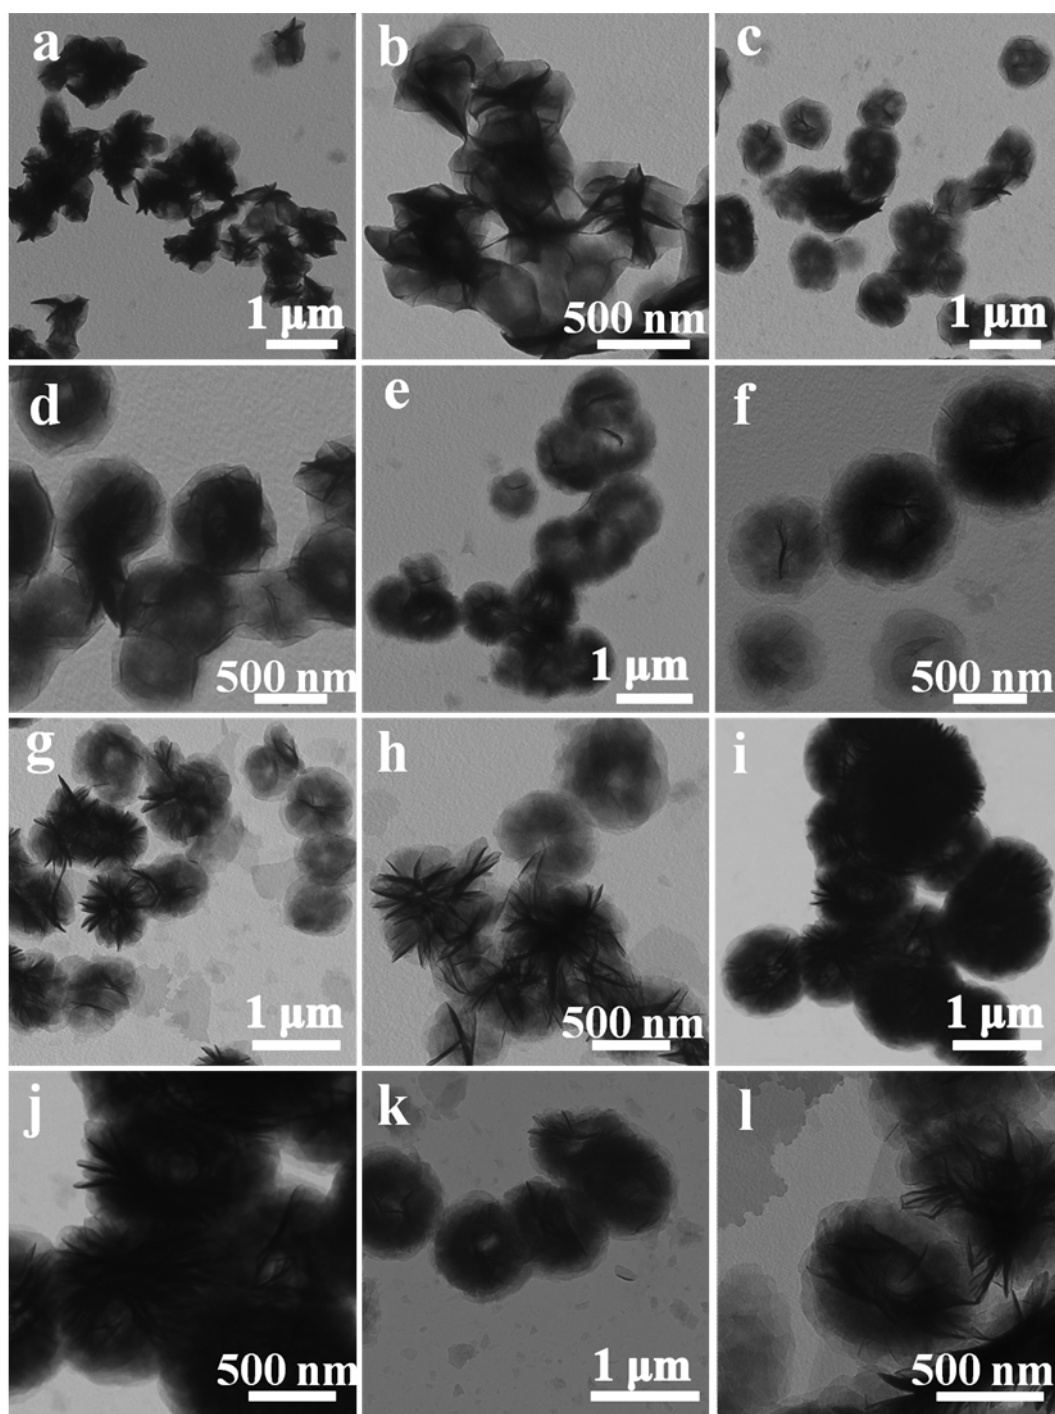

**Fig. S7** TEM images of the Ni-Co-based precursors synthesized at 180 °C for (a, b) 40 min (c, d) 50 min, (e, f) 2.0 h, (g, h) 5.0 h, (i, j) 12.0 h and (k, l) 15.0 h.

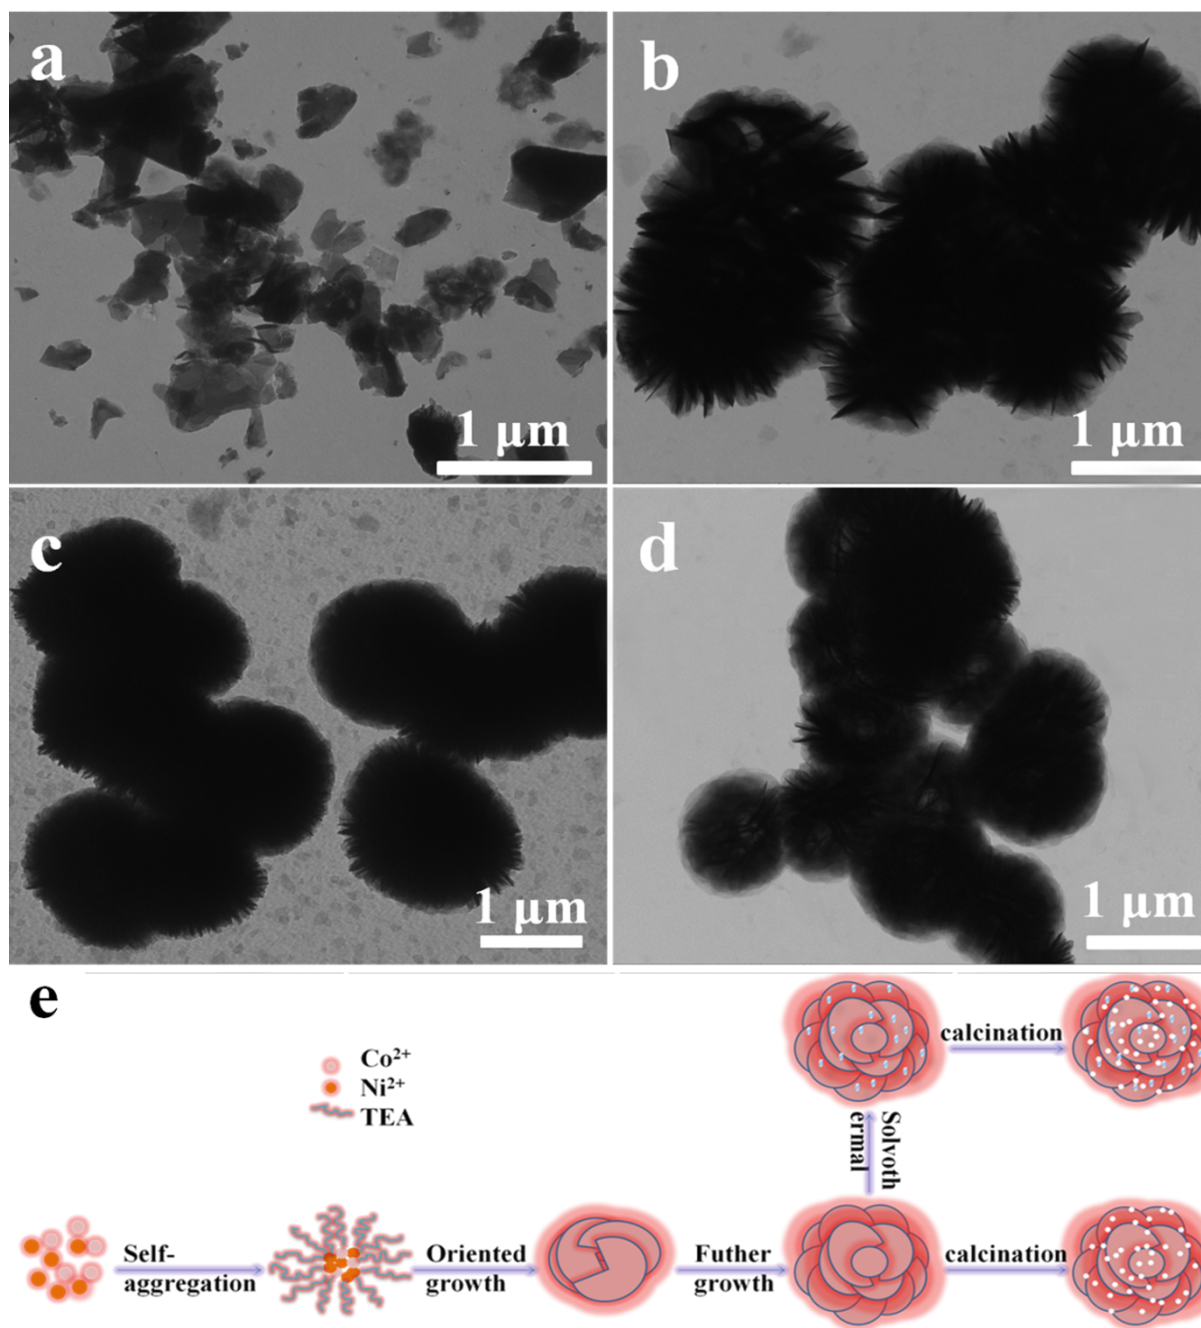

**Fig. S8** TEM images of the Ni-Co-based precursors synthesized with different amounts of TEA: (a) 0 ml, (b) 3 ml, (c) 6 ml, (d) 10 ml at 180 °C while keeping other experimental parameters unchanged; (e) the possible formation mechanism of the 3D hierarchical porous rose-like architectures.

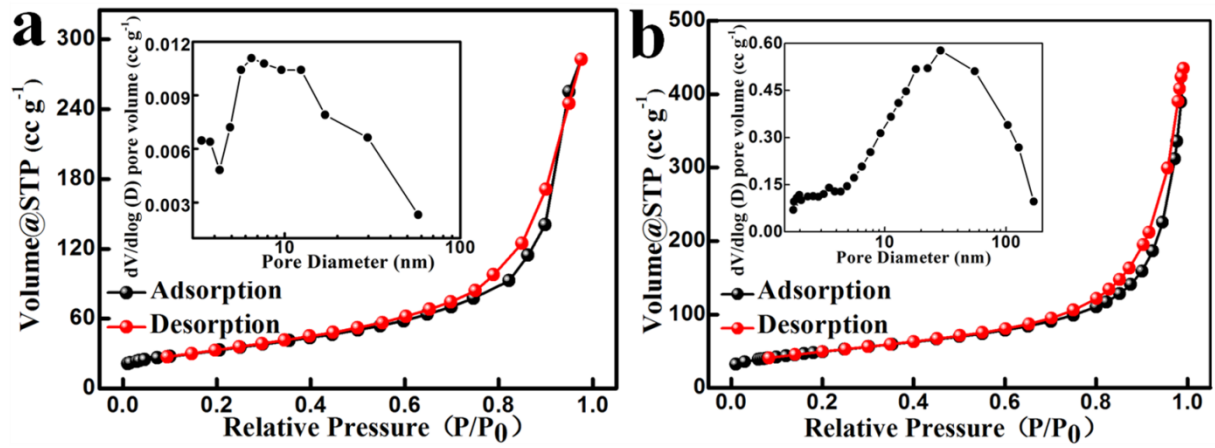

**Fig. S9** Nitrogen adsorption-desorption isotherm and the corresponding pore size distribution (inset) of (a) hierarchical porous rose-like NiCo<sub>2</sub>O<sub>4</sub> and (b) hierarchical porous rose-like NiCo<sub>2</sub>O<sub>4</sub>/MnCo<sub>2</sub>O<sub>4</sub>.

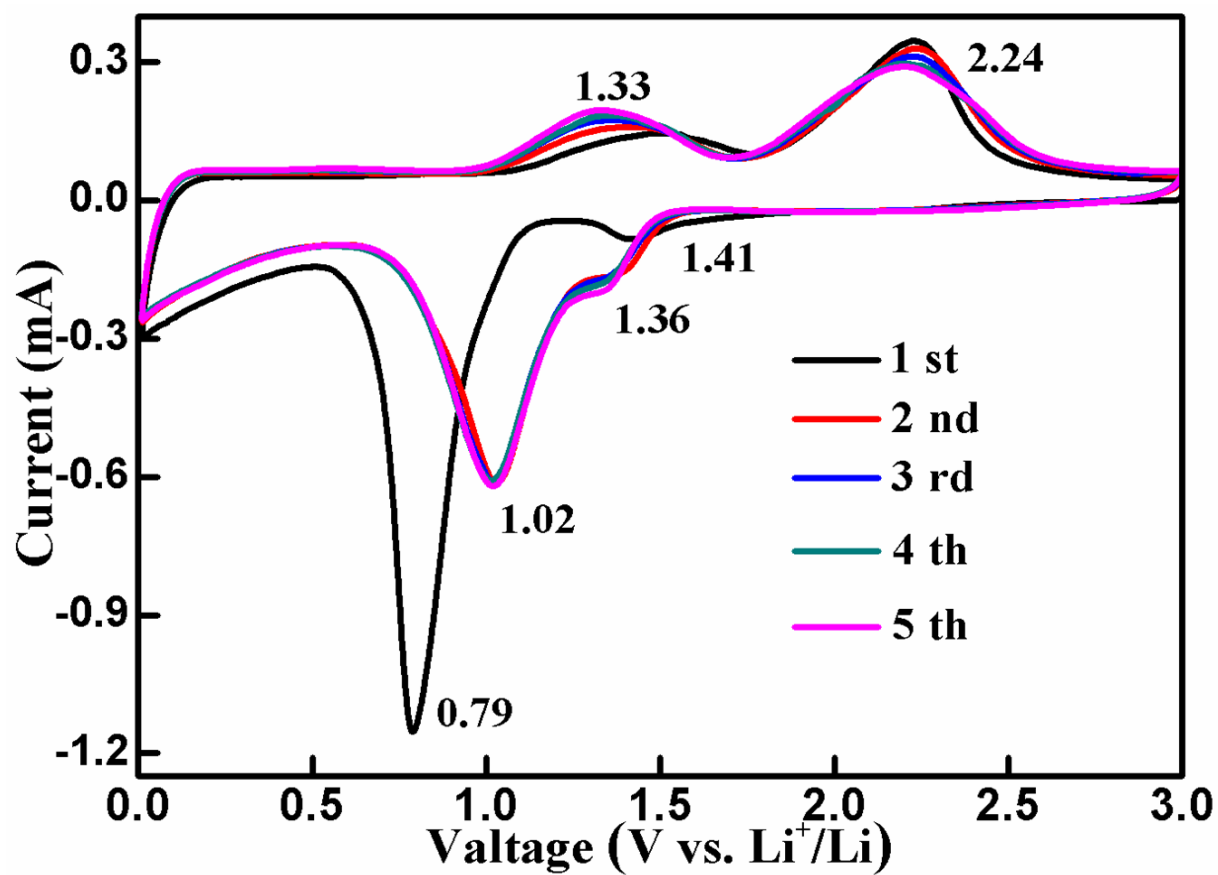

**Fig. S10** The first five cyclic voltammogram curves of the 3D hierarchical porous rose-like NiCo<sub>2</sub>O<sub>4</sub>.



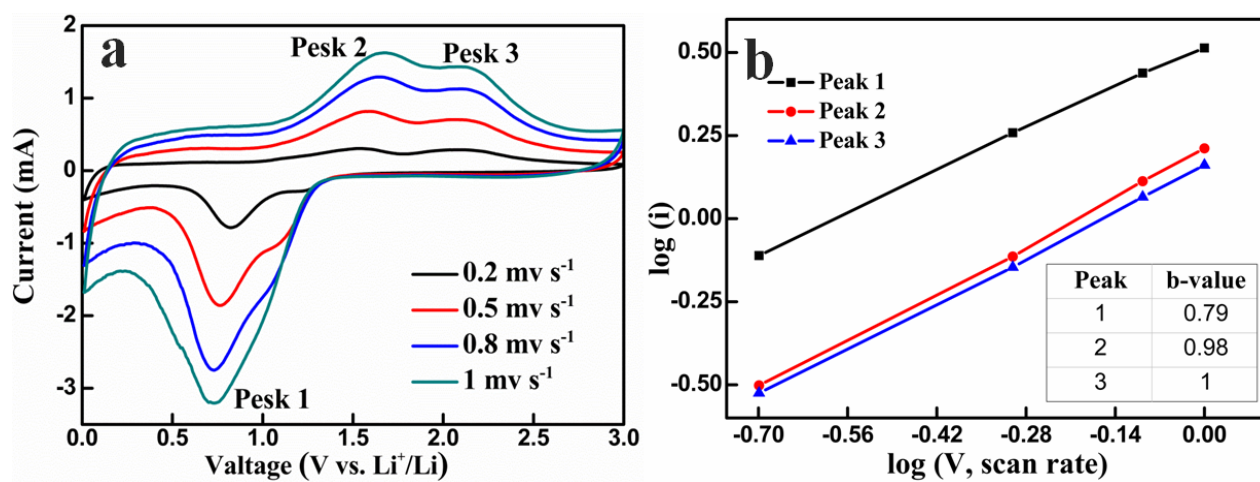

**Fig. S11** (a) CV curves of NiCo<sub>2</sub>O<sub>4</sub>/MnCo<sub>2</sub>O<sub>4</sub> at different scan rate after 350 cycles and (b) log*i* vs. log*v* plots at different peaks.



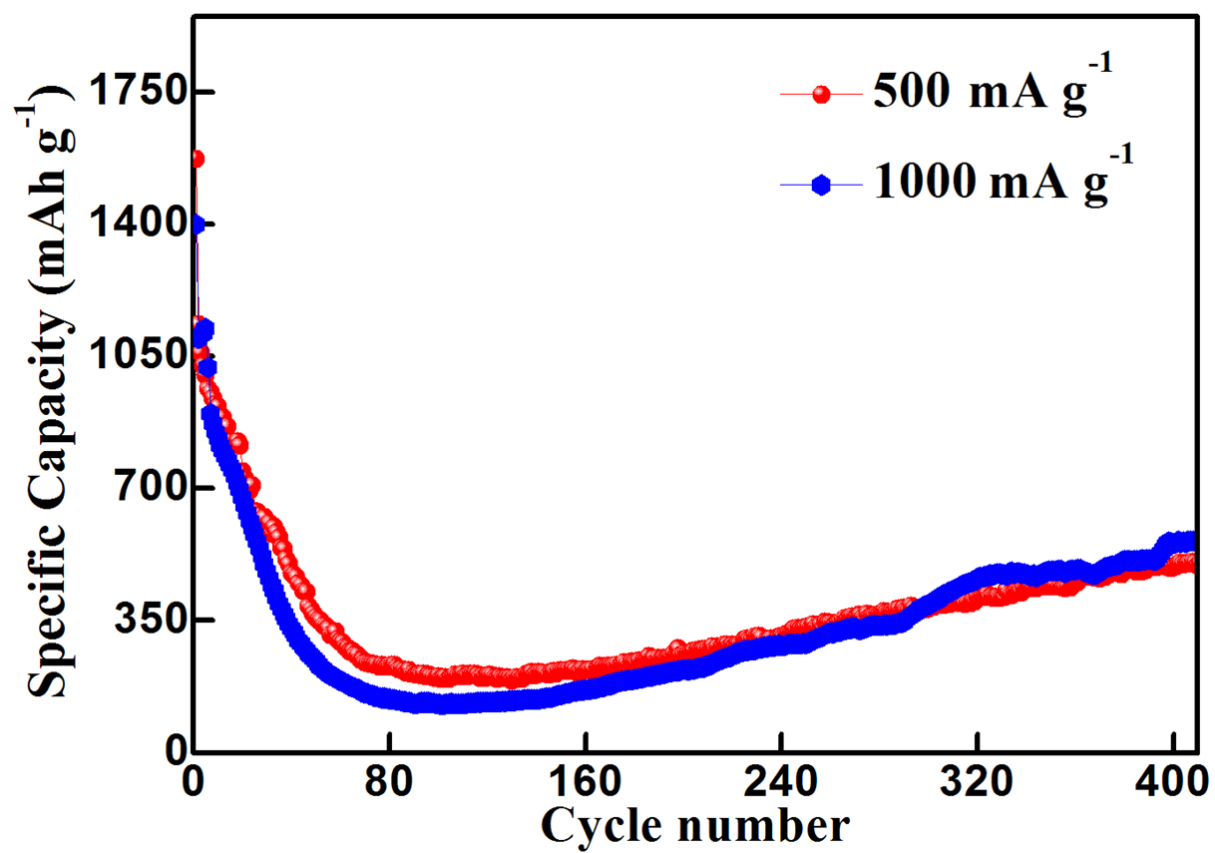

**Fig. S12** Cycling performance of NiCo<sub>2</sub>O<sub>4</sub>/MnCo<sub>2</sub>O<sub>4</sub> with active materials of 70 % at 500 and 1000 mA g<sup>-1</sup>.

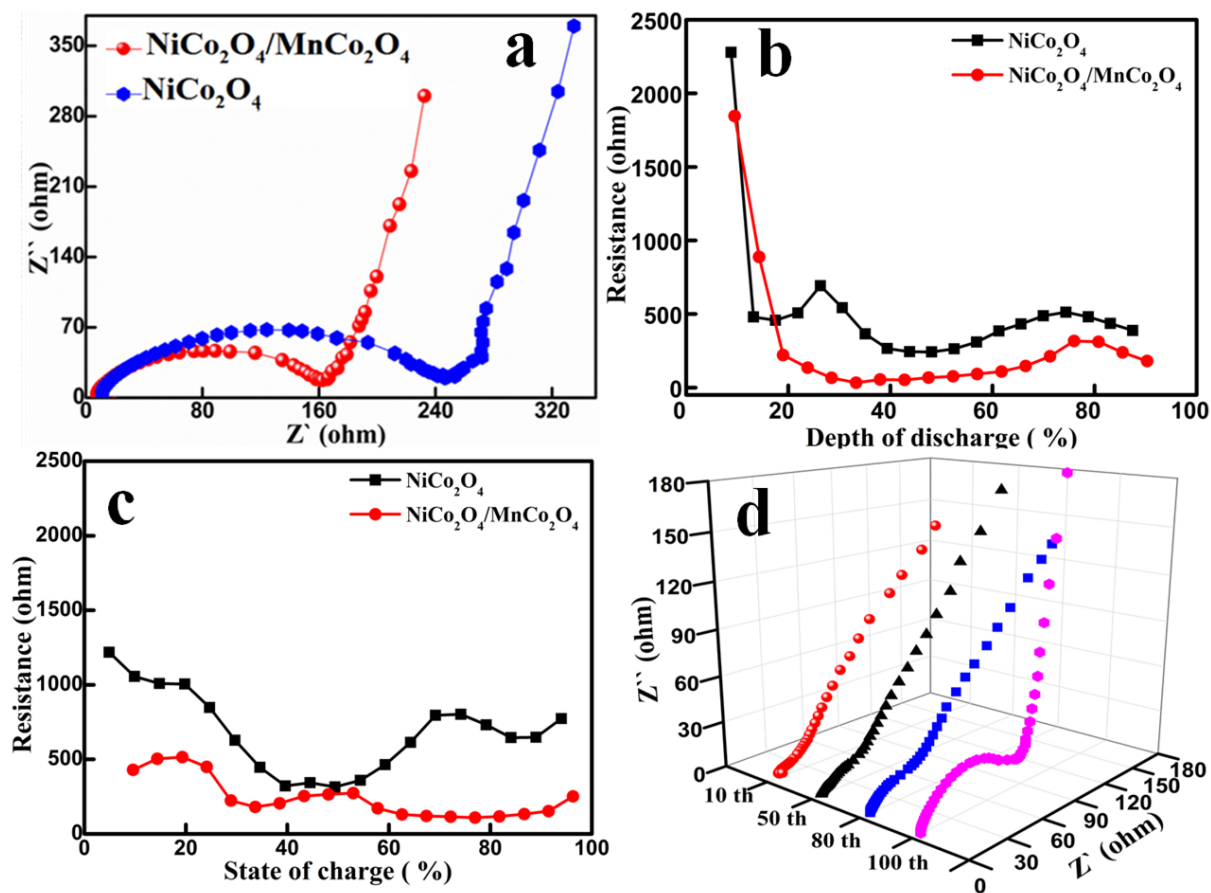

**Fig. S13** (a) Nyquist plots of the AC impedance spectra measured over the frequency ranging from 100 kHz to 0.01 Hz and (b, c) the direct current resistance ( $R_{dc}$ ) for the  $\text{NiCo}_2\text{O}_4/\text{MnCo}_2\text{O}_4$  and  $\text{NiCo}_2\text{O}_4$  electrodes. (d) The AC impedance spectra of the  $\text{NiCo}_2\text{O}_4/\text{MnCo}_2\text{O}_4$  after certain cycles at  $1000 \text{ mA g}^{-1}$  in the frequency ranging from 100 kHz to 0.01 Hz.

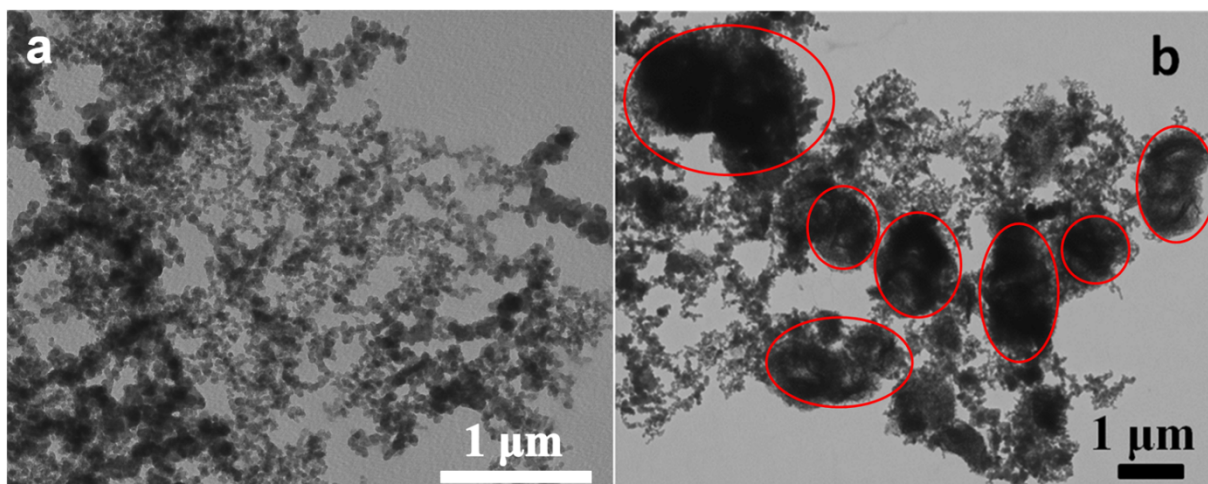

**Fig. S14** (a) TEM image of the acetylene-black used as active material and (b) TEM image of  $\text{NiCo}_2\text{O}_4/\text{MnCo}_2\text{O}_4$  composite used as active material (marked by the red frame) and acetylene-black acted as conductive agent after ten cycles at a current density of  $1000 \text{ mA g}^{-1}$ .
